# Supplementary material for: Environmental Influences on Mammographic Breast Density in California: A Strategy to Reduce Breast Cancer Risk
Source: Int J Environ Res Public Health. 2019 Nov 27;16(23):4731. doi: 10.3390/ijerph16234731 (PMC6926682; doi:10.3390/ijerph16234731)
Supplement: Supplementary file 1 [file ijerph-16-04731-s001.pdf]

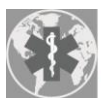

## Supplemental Information S1

### Selected\* Population Studies for Finding Environmental Correlates of MBD

#### 1. California Studies

San Francisco Mammography Registry

<https://mammography.ucsf.edu/>

Rancho Bernardo Study

<https://knit.ucsd.edu/ranchobernardostudy/study-description/>

Multiethnic Cohort Study

<https://www.uhcancercenter.org/mec>

Child Health and Development Studies

<http://www.chdstudies.org/>

California Teachers Study

<https://www.calteachersstudy.org/>

Kaiser Permanente Division of Research (Northern California)

<https://divisionofresearch.kaiserpermanente.org/>

Kaiser Permanente Department of Research and Evaluation (Southern California)

<https://www.kp-scalresearch.org/>

CalVet 2013 Women Veterans Study

<https://www.vacsp.research.va.gov/CSPEC/Studies/INVESTD-R/CalVet-2013-Women-Veterans-Study.asp>

#### 2. National Studies that may also have California participants with available MBD scores

Women's Health Initiative <https://www.whi.org/SitePages/WHI%20Home.aspx>

Nurses Health Study <https://www.nurseshealthstudy.org/>

Black Women's Health Study

<https://epi.grants.cancer.gov/Consortia/members/blackwomen.html>

Study of Women's Health Across the Nation (Swan) <https://www.swanstudy.org/>

\*This list is not meant to be exhaustive. The reader may be aware of other opportunities in addition to these.
